# Supplementary material for: Performance of Large Language Models on Medical Oncology Examination Questions
Source: PubMed Central journal article supplement (PMC11185976; doi:10.1001/jamanetworkopen.2024.17641), 2024-06-18
Supplement: jamanetwopen-e2417641-s003.pdf [file jamanetwopen-e2417641-s003.pdf]

## Data Sharing Statement

Longwell. The Performance of Large Language Models on Medical Oncology Examinations. *JAMA Netw Open*. Published June 18, 2024. doi:10.1001/jamanetworkopen.2024.17641

### Data

**Data available:** Yes

**Data types:** Data (not involving human participants)

**How to access data:** Provided as supplementary material

**When available:** With publication

### Supporting Documents

**Document types:** Other (please specify)

**Additional Information:** Supplement with all of the questions reviewed

**How to access documents:** [robert.grant@uhn.ca](mailto:robert.grant@uhn.ca)

**When available:** With publication

### Additional Information

**Who can access the data:** Researchers whose proposed use of the data has been approved

**Types of analyses:** Any purpose

**Mechanisms of data availability:** With investigator support
